# Supplementary material
Source: PubMed Central journal article supplement (PMC4334698)
Supplement: NIHMS651933-supplement-Supp_FigureS1.pdf [file NIHMS651933-supplement-Supp_FigureS1.pdf]

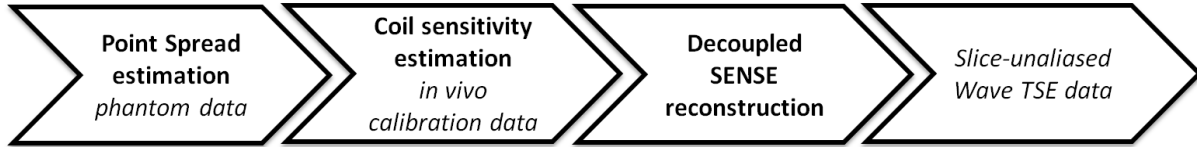

Supporting Fig.1. SMS Wave-CAIPI reconstruction flowchart. Point spread functions estimated on phantom data are combined with coil sensitivity estimates in decoupled SENSE reconstruction for slice unaliasing.
